# Supplementary material
Source: publisher figshare collection journal article supplement (https://diabetesjournals.figshare.com/articles/dataset/_/28550471)

**ESM Table 1.** HLA Class I Antibody details and conditions used in different assays.

| <b>Assay</b>                | <b>Primary Antibody<br/>[Clone]<br/>RRiD</b>                                  | <b>Manufacturer<br/>and Cat#</b>            | <b>Conditions and<br/>Secondary Detection<br/>System</b>                                                                                                                                                                                                          |
|-----------------------------|-------------------------------------------------------------------------------|---------------------------------------------|-------------------------------------------------------------------------------------------------------------------------------------------------------------------------------------------------------------------------------------------------------------------|
| <b>Western Blotting</b>     | HLA-ABCE-HRP<br>[TP25.99SF]<br>RRID:AB_2912972                                | Novus<br>Biologicals<br>C#NBP2-<br>68006H   | 1/1000 dilution overnight<br>at 4°C + 1hr room<br>temperature                                                                                                                                                                                                     |
|                             | HLA-ABCE [HC10]<br>RRID: AB_2728622                                           | 2B Scientific<br>AM33035PU-N<br>Mouse IgG2A | 1/1000 overnight at 4°C                                                                                                                                                                                                                                           |
| <b>Flow Cytometry</b>       | HLA-ABCE-RPE<br>[W6/32]<br>RRID:AB_579554                                     | Agilent<br>C#R7000<br>Mouse mAb             | 1/10 dilution for 30<br>minutes at room<br>temperature                                                                                                                                                                                                            |
| <b>ELISA</b>                | HLA-ABCE [W6/32]<br>(Capture antibody<br>for plate coating)<br>RRID:AB_579554 | Agilent/ Dako<br>C#M073601-2<br>Mouse mAb   | Agilent/ Dako polyclonal<br>Rabbit anti-human $\beta$ 2<br>microglobulin as<br>detection antibody.<br>1/5000 dilution for 1hr at<br>RT; Goat-anti rabbit IgG<br>(whole molecule)-<br>Alkaline Phosphatase as<br>secondary antibody,<br>1/1000 dilution 1hr at RT. |
| <b>Immunohistochemistry</b> | HLA-ABCE [EMR8-5]<br>RRID:AB_1269092                                          | Abcam<br>C#ab70328<br>Mouse mAb             | Dako REAL Envision<br>Detection System;<br>antigen retrieval using<br>10mM citrate pH6.0,<br>1/1500 dilution 1h at RT                                                                                                                                             |

**ESM Table 2:** Human islet donors used for western blotting and sHLA-I ELISA.  
NA – not available

| Sample ID | Gender | Age (y) | BMI | HLA typing                                      |
|-----------|--------|---------|-----|-------------------------------------------------|
| 1         | Male   | 34      | 27  | A1/A3/B7/B44/C5/C7                              |
| 2         | Male   | 44      | 26  | A*02/A*32/B*08/B*51/C*07/C*14                   |
| 3         | Female | 42      | 37  | A*03:01/A*31:01/B*07:02/B*35:01/C*04:01/C*07:01 |
| 4         | Female | 46      | 35  | NA                                              |

**ESM Table 3: Primer sets for Spliced HLA variants.**

| Spliced Variant | Forward              | Reverse                |
|-----------------|----------------------|------------------------|
| HLA-A           | AGAGATACACCTGCCATG   | CCTCCTTTTCTATCCCATCTCA |
| HLA-B           | GGTCATCGGAGCTGTGGTCG | CTGTCGCTGCCCCATCTCAG   |
| HLA-C           | CCCTCGTGCTGAACATGGCA | CCATCTCAGGGTGAGGGGCT   |

**ESM Fig 1A Human  $\beta$  cells release EV under inflammatory conditions.** Pellets were obtained from ultracentrifugation at 100,000 x g of supernatants of  $\beta$  cells

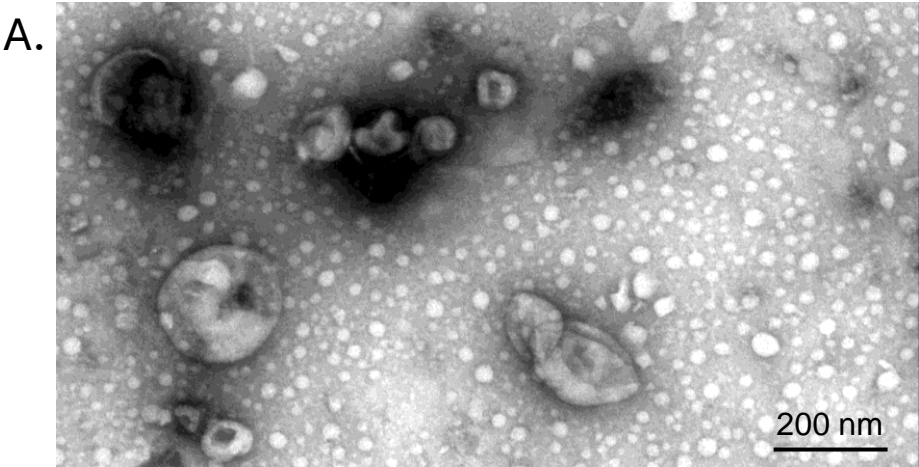

**ESM Fig.1B/C:** CD81 immunogold stained exosomes from IFN treated  $\beta$ -cells cultured for B. 24 h or C. 48h, respectively. Triangles indicate CD81 EV/exosomal specific labelling in the membranes (10 nm gold particles).

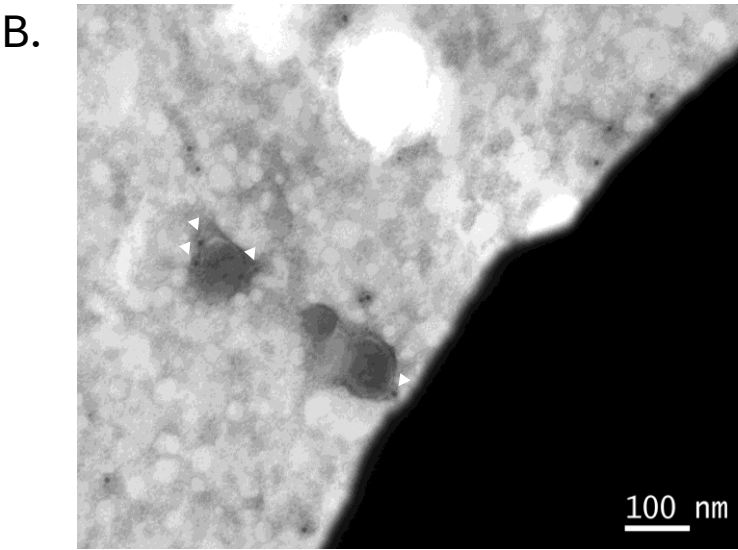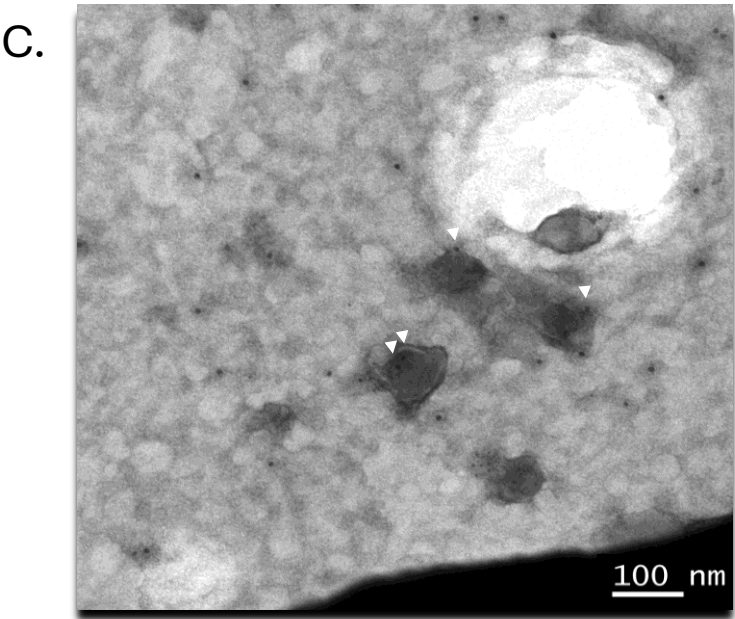

**ESM Fig 2. Total and surface HLA-ABCE expression in IFN-treated HeLa and PANC-1 cell lines.** Cell cultures were treated with IFN $\alpha$  or IFN $\gamma$  for 24 h prior to preparing whole cell lysates for western blotting. HLA-ABCE protein expression was significantly upregulated in whole cell lysates of IFN $\alpha$ - and IFN $\gamma$ -treated HeLa and PANC-1 cell lines. Cell surface expression of HLA-I was measured using flow cytometry. Surface HLA-I expression remains unchanged in both IFN $\alpha$ - and IFN $\gamma$ -treated HeLa and PANC-1 cell lines. Statistical analysis was performed using one way ANOVA on data from three independent experiments. Error bars represent mean  $\pm$  SEM.  $p < 0.05$ : \*;  $p < 0.01$ : \*\*.

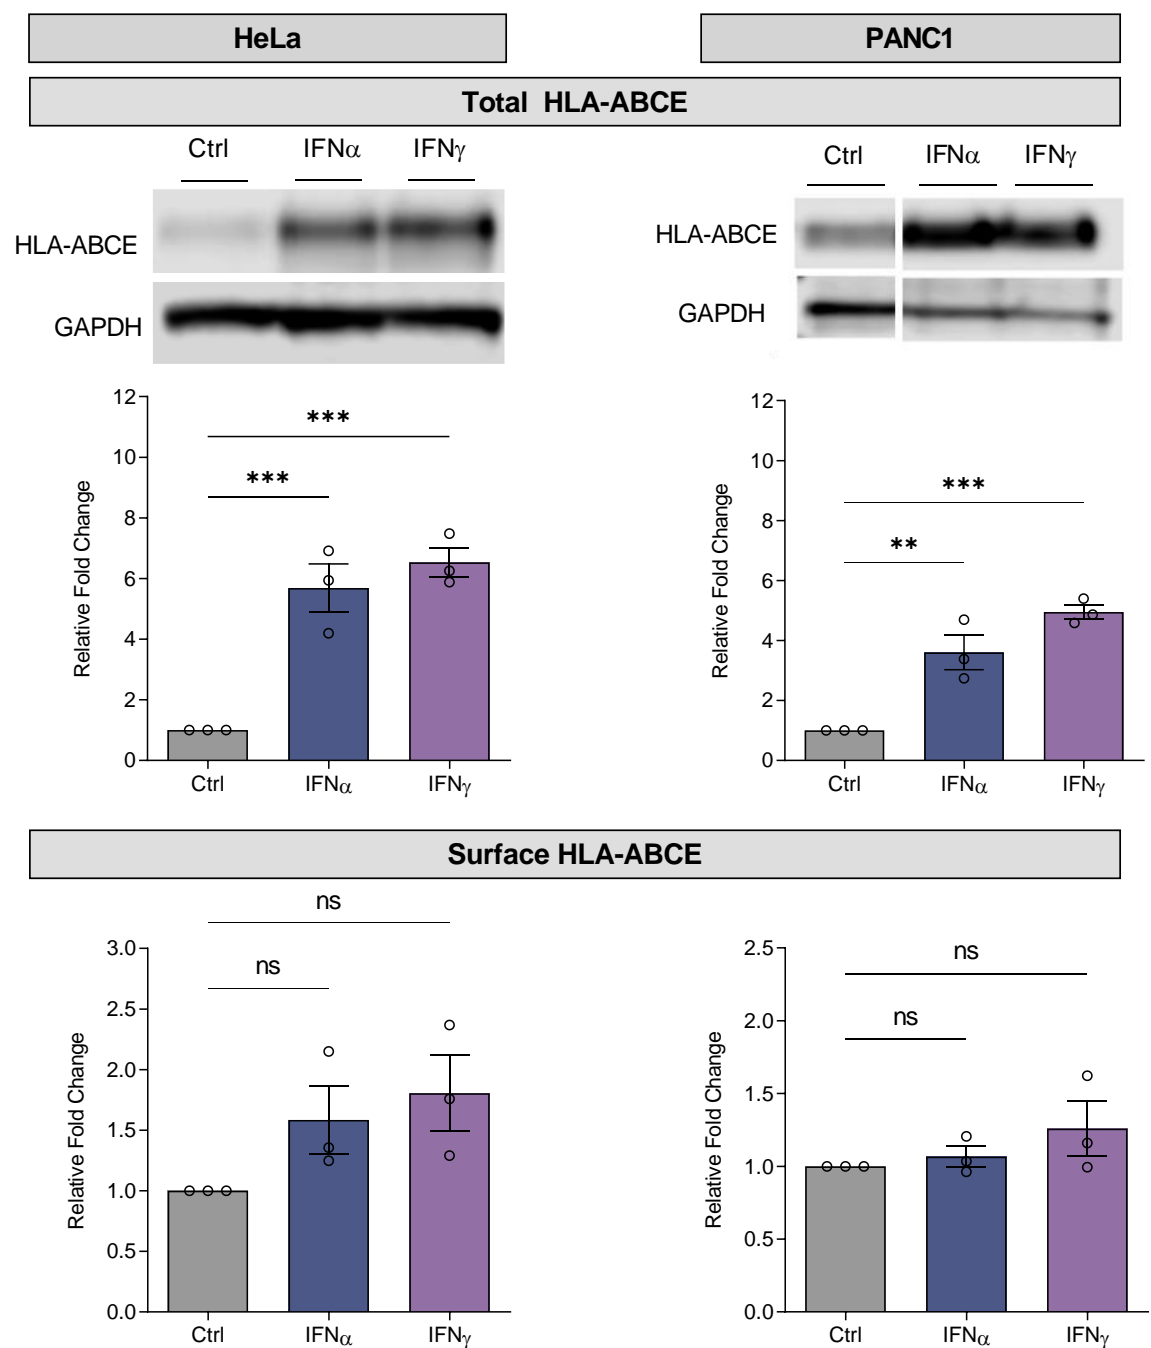

**ESM Fig 3. sHLA-I expression in culture media of IFN-treated HeLa and PANC-1 cell lines.** Cell cultures were treated with IFN $\alpha$  or IFN $\gamma$  for 24 h prior to collecting cell culture media for ELISA. Levels of sHLA-I were significantly upregulated in culture media of IFN $\alpha$ - and IFN $\gamma$ -treated HeLa (A) and PANC-1 cell lines (B). Statistical analysis was performed using one way ANOVA on data from three independent experiments. Error bars represent mean  $\pm$  SEM.  $p < 0.01$ : \*\*;  $p < 0.0001$ : \*\*\*\*.

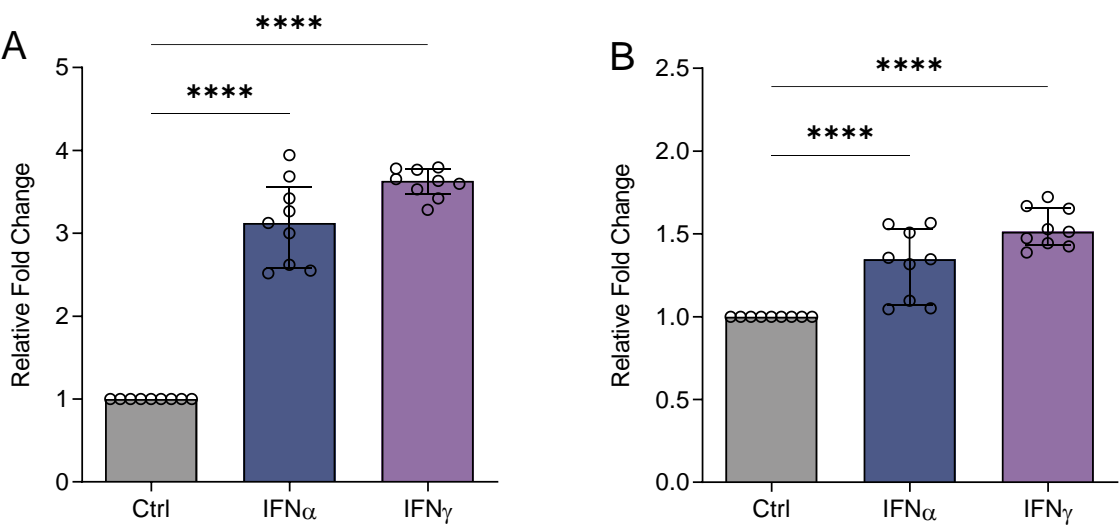

**ESM Fig 4: Concentration of sHLA-I in the supernatant of IFN-treated EndoCβH1 cells.**  
The concentration of sHLA-I in the culture media was determined in untreated (control), IFNα (1000U/ml) or IFNγ (400U/ml)-treated EndoC-βH1 at 24 h. Each point represents the mean±SEM of three technical replicates, n=9 biological replicates. Statistical analysis was performed using one-way ANOVA. The HLA-I monomer standard curve was calculated on a separate plate. Normalisation of blank wells on each plate was performed to calculate the sHLA-I concentration.

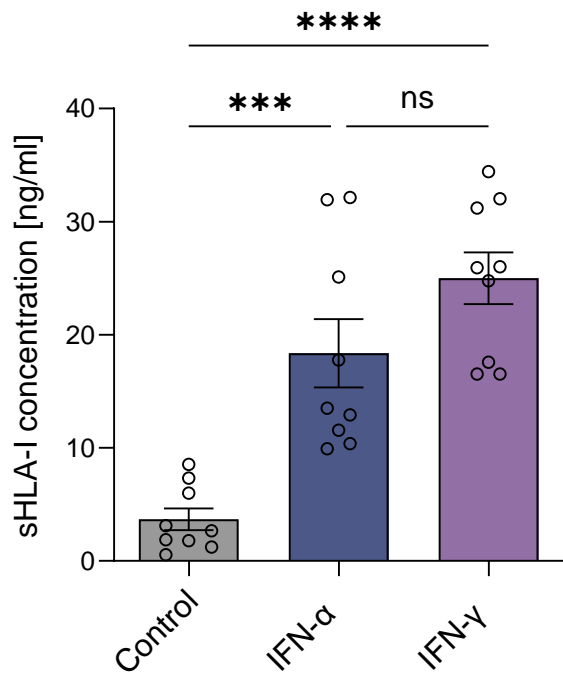

**ESM Fig 5. MMP activity assay confirms the MMPase activity of galardin.** To test whether galardin inhibits the activity of MMPases we used the fluorometric MMP Activity Assay Kit (Abcam). Briefly, EndoC-βH1 were lysed with RIPA buffer. Cell lysates were then mixed at 1:1 ratio with either Assay Buffer from the kit or with 10μM final concentration of galardin and incubated at 37°C for 30 minutes. These mixtures were then mixed at 1:1 ratio with MMP Green reagent and fluorescent intensity was measured immediately after mixing (time 0) and then every 5 minutes for a total of 55 minutes using a PHERAstar plate reader (BMG Labtech, UK). ). Statistical analysis was performed using two way ANOVA on data from three independent experiments. Error bars represent mean +/- SEM. p < 0.01: \*\*; p < 0.0001: \*\*\*\*.

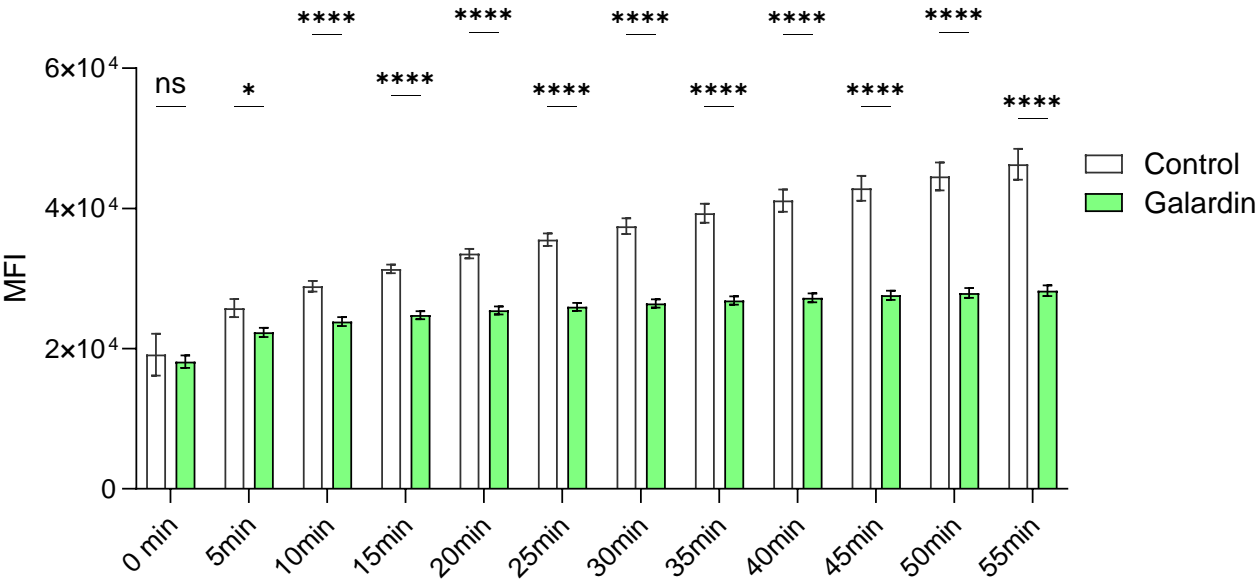

**ESM Fig 6. mRNA expression of HLA-A and HLA-A exon 5 splice variant measured by qRT-PCR in IFN-treated ECN90 cell lines.** Cell cultures were treated with IFN $\alpha$  or IFN $\gamma$  for 24 or 48 h prior to extracting total RNA for cDNA synthesis. Expression of HLA-A mRNA (open bars) and HLA-A exon 5 splice variant mRNA (hashed bars) were upregulated in IFN-treated ECN90s. qRT-PCR was run for each cDNA and the data represent five independent experiments. Each data point represents 2<sup>- $\Delta\Delta$  CT</sup> values of a treated sample normalised to the untreated (Ctrl) sample. Statistical analysis was performed using Kruskal-Wallis test. Error bars represent mean  $\pm$  SEM. p < 0.05: \*; p < 0.01: \*\*; p < 0.001: \*\*\*; p < 0.0001: \*\*\*\*.

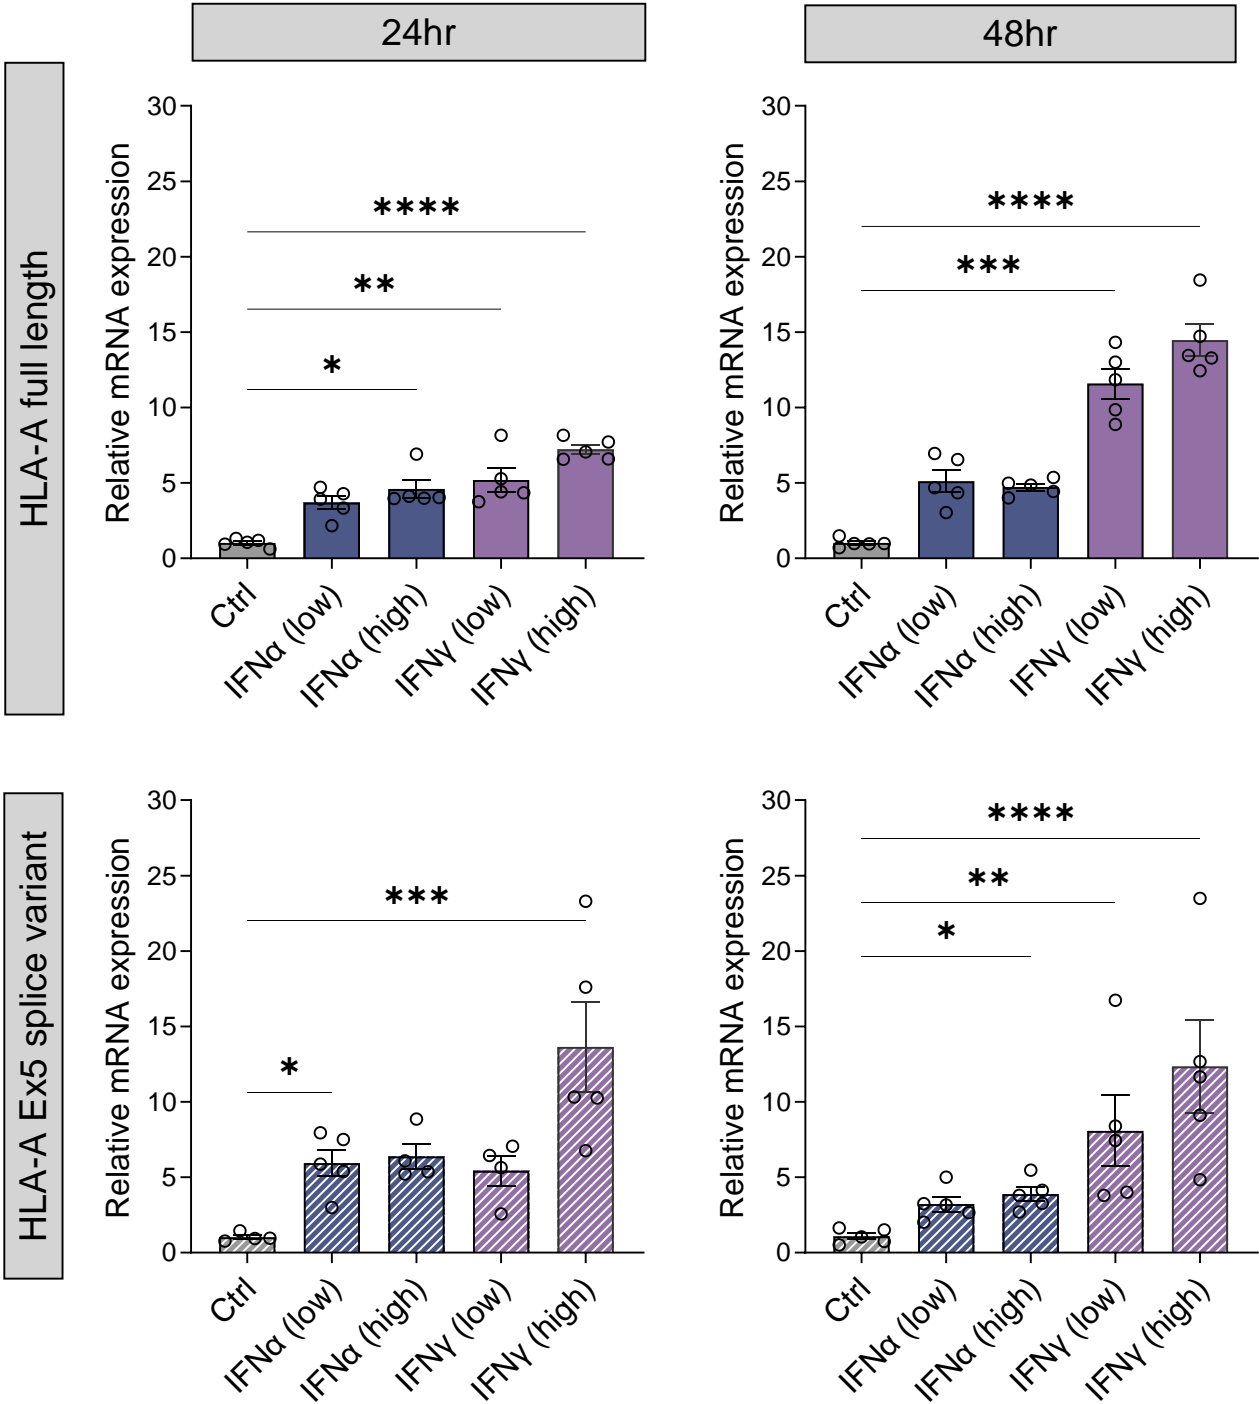

**ESM Fig 7: IFN-treatment of human islets induces an increase in mRNA for the exon 5 splice variant forms of HLA-A, B and C.** Isolated human islets (n=1) were treated with or without IFN-α for 24 h prior to extracting total RNA for cDNA synthesis. Expression of HLA-A, B, C mRNA and HLA-A, B, C exon 5 splice variant mRNA were upregulated following IFN-α treatment. qRT-PCR was run for two-three individual aliquots of the cDNA samples (technical replicates). Each data point represents 2<sup>-ΔΔ CT</sup> values of a treated sample normalised to the untreated control (Ctrl).

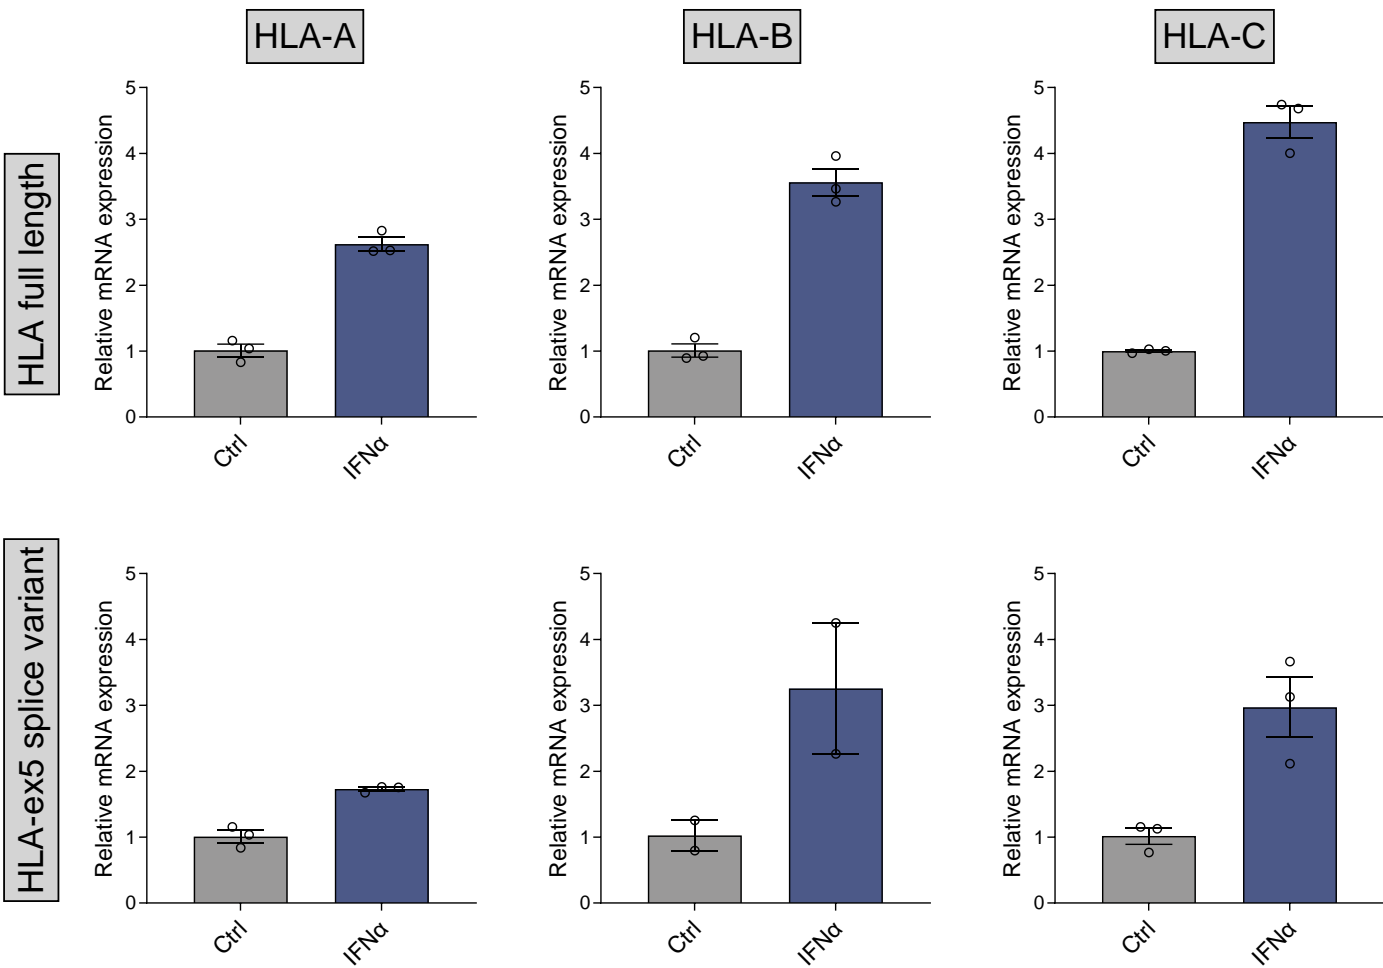

**ESM Fig 8. mRNA expression of HLA-A and HLA-A exon 5 splice variant measured by qRT-PCR in IFN-treated HeLa and PANC-1 cell lines.** Cell cultures were treated with IFN $\alpha$  or IFN $\gamma$  for 24 h prior to extracting total RNA for cDNA synthesis. Expression of HLA-A mRNA (open bars) and HLA-A exon 5 splice variant mRNA (hashed bars) were upregulated in IFN-treated HeLa (A and C), and PANC-1 (B and D). qRT-PCR was run for three technical cDNA replicates in three independent experiments. Each data point represents  $2^{-\Delta\Delta CT}$  values of a treated sample normalised to the untreated (Ctrl) sample. Statistical analysis was performed using Kruskal-Wallis test. Error bars represent mean  $\pm$  SEM.  $p < 0.05$ : \*;  $p < 0.01$ : \*\*;  $p < 0.001$ : \*\*\*;  $p < 0.0001$ : \*\*\*\*.

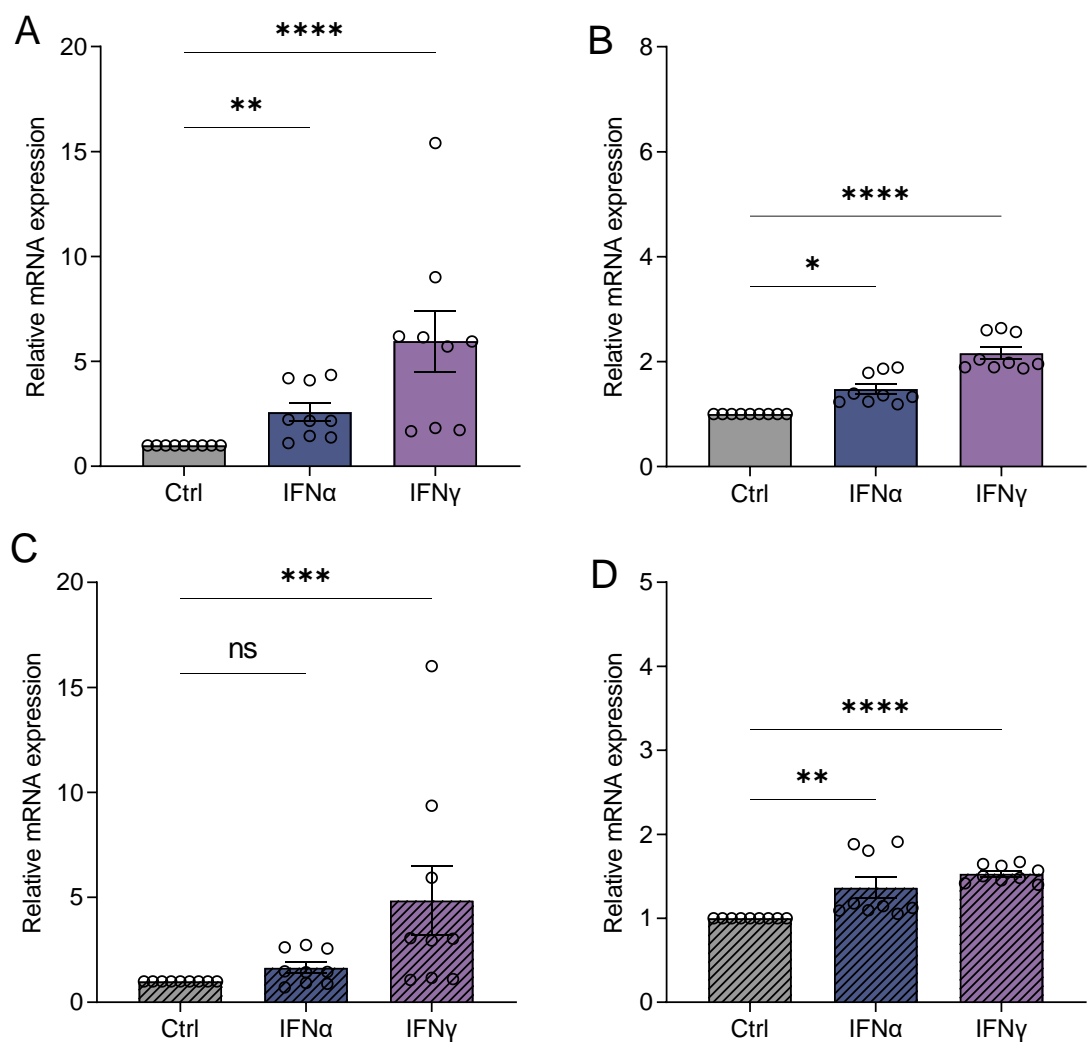

**ESM Fig 9. Comparison of untreated cells revealed that EndoC-βH1 express significantly lower levels of surface HLA-I compared to PANC-1 and HeLa cells.** Statistical analysis was performed using one way ANOVA on data from three independent experiments. Error bars represent mean +/- SEM. p < 0.05: \*; p < 0.01: \*\*; p < 0.001: \*\*\*.

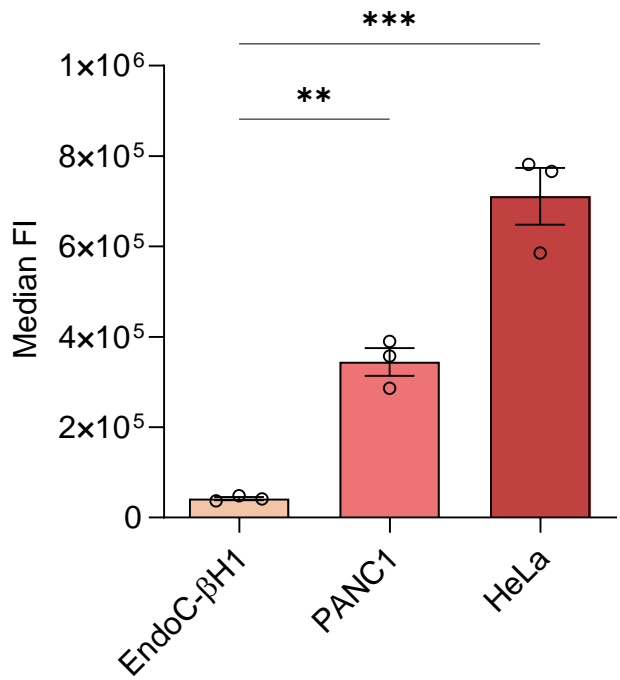

Supplement: Supplementary file 2 [file 1]
